# Supplementary material for: Drug‐Eluting Stent Targeting Sp‐1‐Attenuated Restenosis by Engaging YAP‐Mediated Vascular Smooth Muscle Cell Phenotypic Modulation
Source: PubMed Central journal article supplement — J Am Heart Assoc. 2019 Dec 27;9(1):e014103. doi: 10.1161/JAHA.119.014103 (PMC6988170; doi:10.1161/jaha.119.014103), 2019-12-27
Supplement: JAH3-9-e014103-s001.pdf [file JAH3-9-e014103-s001.pdf]

# **SUPPLEMENTAL MATERIAL**

**Figure S1. siSp-1 regulated smooth muscle cell (SMC) phenotypic modulation and cyclin D expression could be partially reversed by overexpression of Yes-associated protein (YAP).**

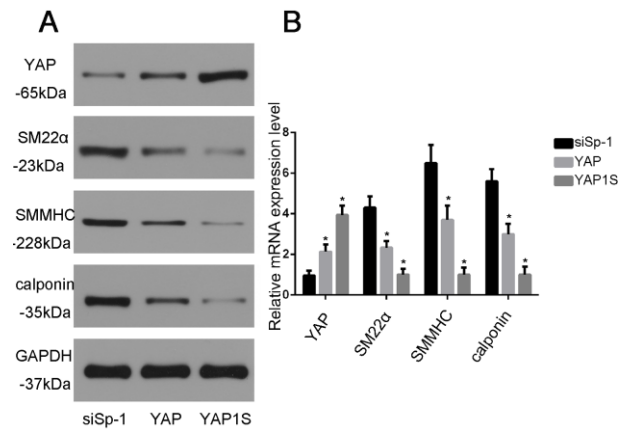

\*, P < 0.05 vs siSp-1 treated group. n=3.
